# Supplementary material
Source: Springer Nature journal article supplement (https://www.springermedizin.de/resource/supplementary/12885_2012_4272_MOESM1_ESM.pdf/9466904)
Supplement: MOESM1 [file 9466904]

53,428 Adult volunteers 21+ years  
enrolled in C8 Health Project

Exclude participants with physician  
diagnosis of non-colorectal cancer  
(CRC) (N=4116)

Eligible for study: 49,312 adults (49,020  
cancer-free controls, 292 adults with  
reported primary CRC)

Exclude participants with missing data  
on serum PFOA or PFOS (N=296)

Remaining eligible participants: 49,016 adults  
(48,725 controls, 291 adults with CRC)

Exclude participants with missing data  
on any other covariate of interest  
(N=1584)

Remaining eligible participants: 47,432 adults  
(48,151 controls, 281 adults with CRC)

Exclude CRC cases with insufficient  
information to validate diagnosis (N=73)

**Final study sample for analysis: 47,359 adults (47,151  
controls, 208 adults with validated diagnosis of CRC)**
